# Supplementary material for: Pressure and temperature dependent kinetics and the reaction mechanism of Criegee intermediates with vinyl alcohol: a theoretical study
Source: Royal Society of Chemistry journal article supplement (doi:10.1039/d3cp06115a), 2024-01-01
Supplement: d3cp06115a1.pdf [file d3cp06115a1.pdf]

## Pressure and temperature dependent kinetics and the reaction mechanism of Criegee intermediates with vinyl alcohol: a theoretical study

Cuihong Sun,<sup>†</sup> Baoen Xu,<sup>†</sup> Yanli Zeng<sup>‡,\*</sup>

<sup>†</sup>*Shijiazhuang Key Laboratory of Low Carbon Energy Materials, Technology Innovation Center of HeBei for Heterocyclic Compound, College of Chemical Engineering, Shijiazhuang University, Shijiazhuang, 050035, P. R. China*

<sup>‡</sup>*College of Chemistry and Materials Science, Hebei Normal University, Shijiazhuang 050024, P.R. China*

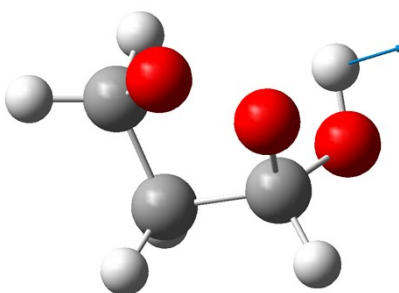

Figure S1 The vector of imaginary frequency in TS9

Table S1 Cartesian coordinates IM8 and TS9

| IM8 |           |           |           | TS9 |           |           |           |
|-----|-----------|-----------|-----------|-----|-----------|-----------|-----------|
| O   | -1.335774 | -0.760334 | 0.023423  | O   | -1.315497 | -0.768930 | 0.071667  |
| C   | -1.236940 | 0.576576  | 0.472043  | C   | -1.215145 | 0.582548  | 0.478623  |
| H   | -2.225378 | 1.016780  | 0.346809  | H   | -2.210745 | 1.009678  | 0.364653  |
| H   | -0.945303 | 0.609675  | 1.529597  | H   | -0.897739 | 0.651673  | 1.526709  |
| O   | 0.021479  | -1.175126 | -0.205695 | O   | 0.026862  | -1.174363 | -0.271033 |
| C   | 0.815263  | -0.020728 | -0.472069 | C   | 0.818253  | -0.015115 | -0.476887 |
| C   | -0.165977 | 1.151037  | -0.438002 | C   | -0.172388 | 1.145218  | -0.469422 |
| H   | 1.306604  | -0.150873 | -1.436081 | H   | 1.350014  | -0.132919 | -1.421182 |
| H   | -0.578833 | 1.330309  | -1.431271 | H   | -0.602601 | 1.284058  | -1.462007 |
| H   | 0.319963  | 2.050592  | -0.065799 | H   | 0.305677  | 2.061551  | -0.130339 |
| O   | 1.837345  | 0.063232  | 0.474937  | O   | 1.794773  | 0.081392  | 0.522443  |
| H   | 1.464473  | -0.119966 | 1.343598  | H   | 1.421970  | -0.254737 | 1.343658  |

Table S2 The rate constants (in  $\text{cm}^3 \text{ molecule}^{-1} \text{ s}^{-1}$ ) of each entrance channels calculated by the traditional transition state theory at 300 K and 760 torr

| reaction channels                     | 1,4-insertion-a | 1,4-insertion-b | cycloaddition | insertion - | insertion- | $k_{\text{total}}$ |
|---------------------------------------|-----------------|-----------------|---------------|-------------|------------|--------------------|
|                                       |                 |                 |               | OH          | CH         |                    |
| $\text{CH}_2\text{OO}+\text{syn-VA}$  | 1.61E-11        | 1.34E-11        | 9.11E-16      | 1.85E-14    | 1.82E-22   | 2.95E-11           |
| $\text{CH}_2\text{OO}+\text{anti-VA}$ | 4.19E-16        | 3.11E-15        | 1.67E-13      | 3.53E-14    | 2.57E-17   | 2.06E-13           |

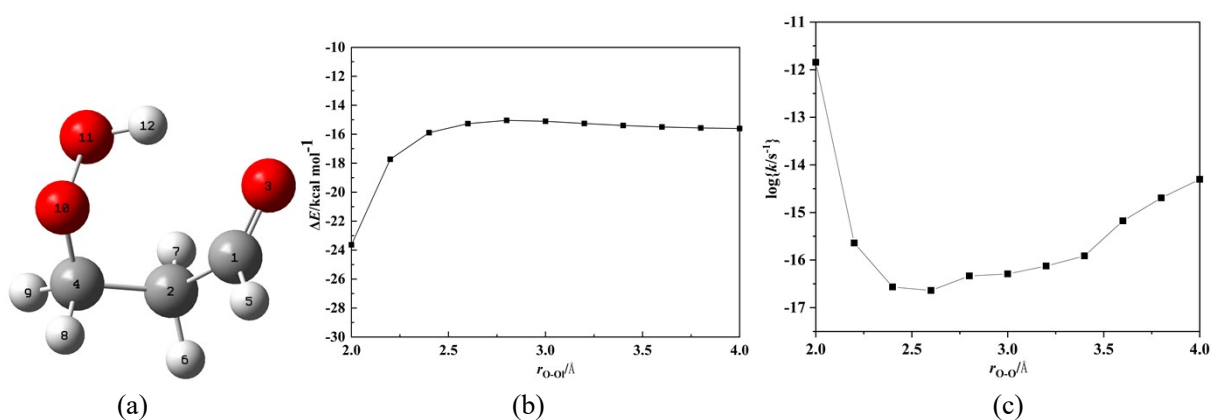

Figure S2 The labels in IM1(a), Minimum energy path (b) and the variation of TST rate constants (c) for the  $\text{IM1} \rightarrow \text{CHOCH}_2\text{CH}_2\text{O} + \text{OH}$  pathway

First, the geometries were optimized along the  $\text{IM1} \rightarrow \text{CHOCH}_2\text{CH}_2\text{O} + \text{OH}$  pathway at the M06-2X/def2TZVP level of theory by varying the dissociating O-O bond distance point by point from 2.0 to 4.0 Å, with an interval of 0.2 Å. The bond angle O10O11H12 and dihedral angle C4O10O11H12 are fixed to avoid OH rotation. Second, we calculate the corresponding energies with HL method based on the optimized geometries, and the minimum energy path (MEP) is shown in Figure S2(b). Since the above reaction is a homolytic cleavage process from a closed shell to an open shell system, we use “guess = mix” to mix the HOMO and LUMO. Third, the dissociation rate constants were calculated point by point along the MEP by the TST theory, as shown in Figure S2(c), the minima of TST appears at the point of  $r_{\text{O-O}} = 2.6$  Å. The corresponding geometry is taken as variational transition state and used to the subsequent master equation

calculation.
